**Title:** CHANGE IN VOLUME OF INTRAOCULAR AIR AND SF<sub>6</sub> DURING N<sub>2</sub>O ANESTHESIA.  
**Authors:** G. Wolf, M.D., C. Capuano, B.S., J. Hartung, Ph.D.  
**Affiliation:** Department of Anesthesiology, State University of New York, Downstate Medical Center, Brooklyn, New York 11203.

**Introduction.** Air or sulfur hexafluoride (SF<sub>6</sub>) is injected into the anterior chamber of the eye during cataract extraction, cornea graft surgery, and repair of retinal tears.<sup>1</sup> It is common practice to achieve anesthesia with nitrous oxide (N<sub>2</sub>O) during such procedures. Since N<sub>2</sub>O is known to increase intraocular pressure after air<sup>2</sup> and SF<sub>6</sub> gas injections, we compared the effect of ventilation with 66% N<sub>2</sub>O in oxygen (N<sub>2</sub>O:O<sub>2</sub>), air, and oxygen (O<sub>2</sub>) on anterior chamber air and SF<sub>6</sub> bubble volume in cats.

**Methods.** Cats were induced with intraperitoneal pentobarbital and acepromazine maleate. They received additional pentobarbital intravenously as necessary, were paralyzed with pancuronium, and were ventilated with either 100% O<sub>2</sub>, air or N<sub>2</sub>O:O<sub>2</sub>.

A forelimb vein was cannulated and 5% dextrose in normal saline administered. Femoral artery cutdown and cannulation allowed continuous blood pressure monitoring and intermittent blood gas determinations. Femoral vein cutdown and cannulation provided continuous venous pressure observation. Ventilation was adjusted to maintain end-tidal carbon dioxide concentration from 3-5%, as determined by infra-red gas analysis, and normal PaCO<sub>2</sub>.

After 30 minutes of ventilatory stabilization, from 0.1-0.5 ml of either air, or SF<sub>6</sub>, was injected into the anterior chamber using a 27 gauge needle inserted adjacent to the limbus. After 180 minutes, anterior chamber gas was similarly aspirated for determination of volume change. Changes were compared across all groups by one-way analysis (p < 0.05, F test).

**Results.** Aspiration of anterior chamber gas 180 minutes after injection showed a greater than two-fold increase in original bubble volume for air, and a greater than three-fold increase in original bubble volume for SF<sub>6</sub> during N<sub>2</sub>O:O<sub>2</sub> ventilation. In contrast, SF<sub>6</sub> bubble volume increased 35% during O<sub>2</sub> ventilation and 50% during air ventilation. When the initial injection was air, bubble volume decreased -13% during O<sub>2</sub> ventilation and increased 7.5% during air ventilation. (See Table 1).

Table 1  
% of initial volume  
after 3 hours ventilation

| Anterior chamber gas            | SF <sub>6</sub> | N | Air     | N  |
|---------------------------------|-----------------|---|---------|----|
| O <sub>2</sub>                  | 35 ± 3          | 8 | -13 ± 3 | 10 |
| Ventilation                     |                 |   |         |    |
| Air                             | 50 ± 6          | 6 | 7.5 ± 3 | 8  |
| N <sub>2</sub> O:O <sub>2</sub> | 242 ± 22        | 9 | 114 ± 7 | 6  |

**Discussion.** Differences between groups are explained by solubility coefficient differences between gases, and by partial pressure differences between anterior chamber bubble and blood. Our results indicate that N<sub>2</sub>O is contraindicated when gas is injected into the closed eye.

**References.**

1. Diddle KR, Smith RE: Intraocular gas injection in the pseudophakic patient. *Am J Ophthalmol* 89:659-661, 1980.
2. Smith RB, Carl B, Linn JG, Nemoto E: Effects of nitrous oxide on air in vitreous. *Am J Ophthalmology* 78:314-327, 1974.
3. Wolf GL, Capuano C, Hartung J: Nitrous oxide increases intraocular pressure after intravitreal sulfur hexachfluoride injection. *Anesth* 59:547-548, 1983.
